# Supplementary material for: Soft Drusen in Age-Related Macular Degeneration: Biology and Targeting Via the Oil Spill Strategies
Source: PubMed Central journal article supplement — Invest Ophthalmol Vis Sci. 2018 Mar;59(4):AMD160–81. doi: 10.1167/iovs.18-24882 (PMC6733535; doi:10.1167/iovs.18-24882), 2018-03
Supplement: iovs-59-04-19_s01.pdf [file iovs-59-04-19_s01.pdf]

Curcio, C. A. Soft drusen in age-related macular degeneration: biology and targeting, via the Oil Spill Strategy.  
Supplementary Material

| <b>Supplementary Table 1: Drusen components, by retinal region</b>                                  |                                                                                                                                                                                                                              |                                                                                                             |
|-----------------------------------------------------------------------------------------------------|------------------------------------------------------------------------------------------------------------------------------------------------------------------------------------------------------------------------------|-------------------------------------------------------------------------------------------------------------|
| <b>Component</b>                                                                                    | <b>Abundance</b>                                                                                                                                                                                                             | <b>Region examined</b>                                                                                      |
| Membranous debris; suggested as lipoprotein-derived debris                                          | Soft drusen, BLinD                                                                                                                                                                                                           | Macula <sup>1-6</sup>                                                                                       |
| EC, UC, phospholipid, unspecified oil red O binding lipid; attributed to lipoprotein particles      | All drusen (filipin); most drusen (oil red O); >40% of hard druse volume; EC pools in soft drusen                                                                                                                            | Unspecified; <sup>7</sup> Macula; <sup>8</sup> Macula vs Periphery; <sup>9,10</sup> Periphery <sup>11</sup> |
| Modified lipids (7-ketocholesterol, isolevuglandin)                                                 | All drusen                                                                                                                                                                                                                   | Periphery; <sup>12</sup> Macula <sup>13</sup>                                                               |
| Apolipoproteins (apoB, A-I, C-I, E)                                                                 | 60-100% of hard drusen; higher rates in periphery than macula                                                                                                                                                                | Macula; <sup>14</sup> Unspecified; <sup>15</sup> Macula vs Periphery; <sup>10</sup> Periphery <sup>16</sup> |
| Melanin/ lipofuscin granules                                                                        | 6% of hard and soft drusen                                                                                                                                                                                                   | Macula vs Periphery <sup>9</sup>                                                                            |
| Cells (dendritic, others)                                                                           | 3-6% of hard drusen only                                                                                                                                                                                                     | Macula vs Periphery; <sup>9</sup> Unspecified <sup>17</sup>                                                 |
| Refractile hydroxyapatite spherules (calcium phosphate); also called amyloid vesicles (0.25 -10 µm) | 2% of hard drusen, 40% of compound drusen, frequent in eyes with many drusen, some AMD eyes; 43% of macular hard drusen, 1.6% of soft drusen, 2% of peripheral hard drusen by light microscopy; all drusen by specific label | Periphery; <sup>11</sup> Macula+Periphery; <sup>9</sup> Macula; <sup>18</sup> Unspecified <sup>19</sup>     |
| Advanced glycation end-products (AGE; pentosidine, carboxymethyl lysine)                            | Prominent                                                                                                                                                                                                                    | Macula; <sup>20</sup> Unspecified; <sup>21</sup>                                                            |
| Non-fibrillar amyloid                                                                               | Prevalence n.a.                                                                                                                                                                                                              | Macula <sup>22</sup>                                                                                        |
| Clusterin                                                                                           | All drusen                                                                                                                                                                                                                   | Macula <sup>23</sup> Periphery; <sup>24</sup>                                                               |
| TIMP3                                                                                               | All drusen                                                                                                                                                                                                                   | Unspecified; <sup>25, 26</sup> Periphery <sup>24</sup>                                                      |
| Vitronectin                                                                                         | All drusen                                                                                                                                                                                                                   | Periphery; <sup>24</sup> Unspecified <sup>27</sup>                                                          |
| C-reactive protein                                                                                  | Some drusen                                                                                                                                                                                                                  | Unspecified; <sup>26, 28</sup> Macula <sup>29</sup>                                                         |
| Complement factor H, C3 fragments, C5                                                               | Many pathway components seen                                                                                                                                                                                                 | Unspecified <sup>27, 28, 30, 31</sup><br>Macula; <sup>29</sup> Periphery <sup>24</sup>                      |

|                                                                                                                                                                                                                                                                                                                                                                                                                                                                                                                                                                                                                                                                                                                             |                                         |                                                                  |
|-----------------------------------------------------------------------------------------------------------------------------------------------------------------------------------------------------------------------------------------------------------------------------------------------------------------------------------------------------------------------------------------------------------------------------------------------------------------------------------------------------------------------------------------------------------------------------------------------------------------------------------------------------------------------------------------------------------------------------|-----------------------------------------|------------------------------------------------------------------|
| Membrane attack complex (C5b-9)                                                                                                                                                                                                                                                                                                                                                                                                                                                                                                                                                                                                                                                                                             | Terminal step of complement activation  | Macula (hard drusen); <sup>32-35</sup> Unspecified<br>26, 30, 36 |
| RGR-d                                                                                                                                                                                                                                                                                                                                                                                                                                                                                                                                                                                                                                                                                                                       | All drusen                              | Macula <sup>37</sup>                                             |
| $\alpha$ A- and $\alpha$ B-crystallin                                                                                                                                                                                                                                                                                                                                                                                                                                                                                                                                                                                                                                                                                       | N.A.; higher in BrM, more in AMD drusen | Macula+Periphery <sup>38</sup> Macula+Periphery<br>39            |
| Ubiquitin                                                                                                                                                                                                                                                                                                                                                                                                                                                                                                                                                                                                                                                                                                                   | Most drusen in most eyes                | Unspecified <sup>40, 41</sup>                                    |
| Carbohydrates                                                                                                                                                                                                                                                                                                                                                                                                                                                                                                                                                                                                                                                                                                               | All drusen                              | Unspecified <sup>42</sup>                                        |
| Zinc                                                                                                                                                                                                                                                                                                                                                                                                                                                                                                                                                                                                                                                                                                                        | Many drusen                             | Macula+Periphery <sup>43, 44</sup>                               |
| Iron                                                                                                                                                                                                                                                                                                                                                                                                                                                                                                                                                                                                                                                                                                                        | Many drusen                             | Macula+Periphery <sup>44</sup>                                   |
| Exosome markers CD63, CD81, and LAMP2                                                                                                                                                                                                                                                                                                                                                                                                                                                                                                                                                                                                                                                                                       | N.A.                                    | Unspecified <sup>33</sup>                                        |
| Bestrophin, membrane-bound                                                                                                                                                                                                                                                                                                                                                                                                                                                                                                                                                                                                                                                                                                  | N.A.                                    | Unspecified <sup>45</sup>                                        |
| <p>Notes:<br/> Retinal regions, Macula – only Macula was studied; Periphery – only Periphery was studied; Macula vs Periphery – both regions were studied and compared; Macula+Periphery – drusen from both regions were both studied and reported together; Unspecified, not indicated and not determinable from illustrations.<br/> Localization methods, immunohistochemistry, histochemistry, immuno-gold transmission electron microscopy; Direct assays, proteomics, western blot, microprobe synchrotron X-ray fluorescence for zinc; N.A. not available; Varying estimates of druse components are due to differences in location of samples and druse types examined. “All drusen” means “all drusen sampled.”</p> |                                         |                                                                  |

1. Sarks JP, Sarks SH, Killingsworth MC. Evolution of geographic atrophy of the retinal pigment epithelium. *Eye* 1988;2:552-577.
2. Sarks JP, Sarks SH, Killingsworth MC. Evolution of soft drusen in age-related macular degeneration. *Eye* 1994;8:269-283.
3. Sarks SH, Arnold JJ, Sarks JP, Gilles MC, Walter CJ. Prophylactic perifoveal laser treatment of soft drusen. *Aust N Z J Ophthalmol* 1996;24:15-26.
4. Curcio CA, Messinger JD, Sloan KR, McGwin G, Jr, Medeiros NE, Spaide RF. Subretinal drusenoid deposits in non-neovascular age-related macular degeneration: morphology, prevalence, topography, and biogenesis model. *Retina* 2013;33:265-276.

5. Pilgrim MG, Lengyel I, Lanzirotti A, et al. Sub-retinal pigment epithelial deposition of drusen components including hydroxyapatite in a primary cell culture model. *Invest Ophthalmol Vis Sci* 2017;58:708–719.
6. Balaratnasingam C, Cherepanoff S, Dolz-Marco R, et al. Cuticular drusen: clinical phenotypes and natural course defined using multimodal imaging. *Ophthalmology* 2018;125:100-118.
7. Farkas TG, Sylvester V, Archer D, Altona M. The histochemistry of drusen. *American Journal of Ophthalmology* 1971;71:1206-1215.
8. Pauleikhoff D, Zuels S, Sheraidah GS, Marshall J, Wessing A, Bird AC. Correlation between biochemical composition and fluorescein binding of deposits in Bruch's membrane. *Ophthalmol* 1992;99:1548-1553.
9. Rudolf M, Clark ME, Chimento M, Li C-M, Medeiros NE, Curcio CA. Prevalence and morphology of druse types in the macula and periphery of eyes with age-related maculopathy. *Invest Ophthalmol Vis Sci* 2008;49:1200-1209.
10. Malek G, Li C-M, Guidry C, Medeiros NE, Curcio CA. Apolipoprotein B in cholesterol-containing drusen and basal deposits in eyes with age-related maculopathy. *Am J Pathol* 2003;162:413-425.
11. Anderson DH, Talaga KC, Rivest AJ, Barron E, Hageman GS, Johnson LV. Characterization of beta amyloid assemblies in drusen: the deposits associated with aging and age-related macular degeneration. *Exp Eye Res* 2004;78:243-256.
12. Rodriguez IR, Clark ME, Lee JW, Curcio CA. 7-ketocholesterol accumulates in ocular tissues as a consequence of aging and is present in high levels in drusen. *Exp Eye Res* 2014;128:151-155.
13. Charvet CD, Saadane A, Wang M, et al. Pretreatment with pyridoxamine mitigates isolevuglandin-associated retinal effects in mice exposed to bright light. *J Biol Chem* 2013;288:29267-29280.
14. Klaver CC, Kliffen M, van Duijn CM, et al. Genetic association of apolipoprotein E with age-related macular degeneration. *Am J Hum Genet* 1998;63:200-206.
15. Anderson DH, Ozaki S, Nealon M, et al. Local cellular sources of apolipoprotein E in the human retina and retinal pigmented epithelium: implications for the process of drusen formation. *Am J Ophthalmol* 2001;131:767-781.
16. Li C-M, Clark ME, Chimento MF, Curcio CA. Apolipoprotein localization in isolated drusen and retinal apolipoprotein gene expression. *Invest Ophthalmol Vis Sci* 2006;47:3119-3128.
17. Hageman GS, Luthert PJ, Chong NHC, Johnson LV, Anderson DH, Mullins RF. An integrated hypothesis that considers drusen as biomarkers of immune-mediated processes at the RPE-Bruch's membrane interface in aging and age-related macular degeneration. *Progr Ret Eye Res* 2001;20:705-732.
18. Dentchev T, Milam AH, Lee VM, Trojanowski JQ, Dunaief JL. Amyloid-beta is found in drusen from some age-related macular degeneration retinas, but not in drusen from normal retinas. *Mol Vis* 2003;9:184-190.
19. Thompson RB, Reffatto V, Bundy JG, et al. Identification of hydroxyapatite spherules provides new insight into subretinal pigment epithelial deposit formation in the aging eye. *Proc Natl Acad Sci U S A* 2015;112:1565-1570.

20. Ishibashi T, Murata T, Hangai M, et al. Advanced glycation end products in age-related macular degeneration. *Arch Ophthalmol* 1998;116:1629-1629.
21. Handa JT, Verzijl N, Matsunaga H, et al. Increase in the advanced glycation end product pentosidine in Bruch's membrane with age. *Invest Ophthalmol Vis Sci* 1999;40:775-779.
22. Luibl V, Isas JM, Kaye R, Glabe CG, Langen R, Chen J. Drusen deposits associated with aging and age-related macular degeneration contain nonfibrillar amyloid oligomers. *J Clin Invest* 2006;116:378-385.
23. Sakaguchi H, Miyagi M, Shadrach KG, Rayborn ME, Crabb JW, Hollyfield JG. Clusterin is present in drusen in age-related macular degeneration. *Exp Eye Res* 2002;74:547-549.
24. Wang L, Clark ME, Crossman DK, et al. Abundant lipid and protein components of drusen. *PLoS ONE* 2010;5:e10329.
25. Fariss RN, Apte SS, Olsen BR, Iwata K, Milam AH. Tissue inhibitor of metalloproteinases-3 is a component of Bruch's membrane of the eye. *Am J Pathol* 1997;150:323-328.
26. Mullins RF, Russell SR, Anderson DH, Hageman GS. Drusen associated with aging and age-related macular degeneration contain proteins common to extracellular deposits associated with atherosclerosis, elastosis, amyloidosis, and dense deposit disease. *FASEB J* 2000;14:835-846.
27. Hageman GS, Mullins RF, Russell SR, Johnson LV, Anderson DH. Vitronectin is a constituent of ocular drusen and the vitronectin gene is expressed in human retinal pigmented epithelial cells. *The FASEB journal : official publication of the Federation of American Societies for Experimental Biology* 1999;13:477-484.
28. Anderson DH, Mullins RF, Hageman GS, Johnson LV. A role for local inflammation in the formation of drusen in the aging eye. *Am J Ophthalmol* 2002;134:411-431.
29. Bhutto IA, Baba T, Merges C, Juriasinghani V, McLeod DS, Luttly GA. C-reactive protein and complement factor H in aged human eyes and eyes with age-related macular degeneration. *British Journal of Ophthalmology* 2011;95:1323-1330.
30. Johnson LV, Ozaki S, Staples MK, Erickson PA, Anderson DH. A potential role for immune complex pathogenesis in drusen formation. *Experimental Eye Research* 2000;70:441-449.
31. Anderson DH, Radeke MJ, Gallo NB, et al. The pivotal role of the complement system in aging and age-related macular degeneration: hypothesis re-visited. *Prog Retin Eye Res* 2010;29:95-112.
32. Seth A, Cui J, To E, Kwee M, Matsubara J. Complement-associated deposits in the human retina. *Invest Ophthalmol Vis Sci* 2008;49:743-750.
33. Wang AL, Lukas TJ, Yuan M, Du N, Tso MO, Neufeld AH. Autophagy and exosomes in the aged retinal pigment epithelium: possible relevance to drusen formation and age-related macular degeneration. *PLoS ONE* 2009;4:e4160.
34. Mullins RF, Schoo DP, Sohn EH, et al. The membrane attack complex in aging human choriocapillaris: relationship to macular degeneration and choroidal thinning. *Am J Pathol* 2014;184:3142-3153.

35. Chirco KR, Scott Whitmore S, Wang K, et al. Monomeric C-reactive protein and inflammation in Age-related Macular Degeneration. *J Pathol* 2016.
36. Gerl VB, Bohl J, Pitz S, Stoffelns B, Pfeiffer N, Bhakdi S. Extensive deposits of complement C3d and C5b-9 in the choriocapillaris of eyes of patients with diabetic retinopathy. *Invest Ophthalmol Vis Sci* 2002;43:1104-1108.
37. Kochounian H, Johnson LV, Fong HK. Accumulation of extracellular RGR-d in Bruch's membrane and close association with drusen at intercapillary regions. *Exp Eye Res* 2009;88:1129-1136.
38. Crabb JW, Miyagi M, Gu X, et al. Drusen proteome analysis: an approach to the etiology of age-related macular degeneration. *Proc Natl Acad Sci U S A* 2002;99:14682-14687.
39. Nakata K, Crabb JW, Hollyfield JG. Crystallin distribution in Bruch's membrane-choroid complex from AMD and age-matched donor eyes. *Exp Eye Res* 2005;80:821-826.
40. Loeffler KU, Mangini NJ. Immunolocalization of ubiquitin and related enzymes in human retina and retinal pigment epithelium. *Graefes Arch Clin Exp Ophthalmol* 1997;235:248-254.
41. Leger F, Fernagut PO, Canron MH, et al. Protein aggregation in the aging retina. *J Neuropathol Exp Neurol* 2011;70:63-68.
42. Mullins RF, Hageman GS. Human ocular drusen possess novel core domains with a distinct carbohydrate composition. *J Histochem Cytochem* 1999;47:1533-1539.
43. Lengyel I, Flinn JM, Peto T, et al. High concentration of zinc in sub-retinal pigment epithelial deposits *Exp Eye Res* 2007;84:772-780.
44. Flinn JM, Kakalec P, Tappero R, Jones B, Lengyel I. Correlations in distribution and concentration of calcium, copper and iron with zinc in isolated extracellular deposits associated with age-related macular degeneration. *Metallomics* 2014;6:1223 - 1228.
45. Gouras P, Braun K, Ivert L, Neuringer M, Mattison JA. Bestrophin detected in the basal membrane of the retinal epithelium and drusen of monkeys with drusenoid maculopathy. *Graefes Arch Clin Exp Ophthalmol* 2009;247:1051-1056.
